# Supplementary material for: Hypotheses and evidence related to intense sweeteners and effects on appetite and body weight changes: A scoping review of reviews
Source: PubMed Central journal article supplement (PMC6051566; doi:10.1371/journal.pone.0199558), 2018-07-18
Supplement: pone.0199558.s001.pdf [file pone.0199558.s001.pdf]

Ovid MEDLINE(R) Epub Ahead of Print, In-Process & Other Non-Indexed Citations, Ovid MEDLINE(R) Daily and Ovid MEDLINE(R) <1946 to Present>

| #  | Searches                                                                                                                                                                                                                                                         |
|----|------------------------------------------------------------------------------------------------------------------------------------------------------------------------------------------------------------------------------------------------------------------|
| 1  | Aspartame/                                                                                                                                                                                                                                                       |
| 2  | Cyclamates/                                                                                                                                                                                                                                                      |
| 3  | Saccharin/                                                                                                                                                                                                                                                       |
| 4  | Stevia/                                                                                                                                                                                                                                                          |
| 5  | Glycosides/                                                                                                                                                                                                                                                      |
| 6  | Sweetening Agents/                                                                                                                                                                                                                                               |
| 7  | (acesulfam* or aspartam* or cyclam* or sacchar* or sucralose* or neohesperidin* or stevi* or glycosid* or neotame* or sweetening or sweetened or sweetener* or sugar substitute* or sugar free or non-nutritiv* or non-calori* or low-calori* or low-energy).tw. |
| 8  | or/1-7                                                                                                                                                                                                                                                           |
| 9  | Appetite Regulation/                                                                                                                                                                                                                                             |
| 10 | Body Weight/                                                                                                                                                                                                                                                     |
| 11 | Body Weight Changes/                                                                                                                                                                                                                                             |
| 12 | Overweight/                                                                                                                                                                                                                                                      |
| 13 | Weight Gain/                                                                                                                                                                                                                                                     |
| 14 | Body Mass Index/                                                                                                                                                                                                                                                 |
| 15 | Obesity/                                                                                                                                                                                                                                                         |
| 16 | Weight Loss/                                                                                                                                                                                                                                                     |
| 17 | ((food* or eat*) adj3 (intake* or regulat* or control* or behavio*)).tw.                                                                                                                                                                                         |
| 18 | (appetite* or body weight* or overweight* or weight change* or weight reduc* or weight development* or weight gain* or weight loss* or body mass index or BMI or obesity or gut brain signal* or neuro-behavio* or neurobehavio*).tw.                            |
| 19 | or/9-18                                                                                                                                                                                                                                                          |
| 20 | 8 and 19                                                                                                                                                                                                                                                         |
| 21 | limit 21 to "reviews (best balance of sensitivity and specificity)"                                                                                                                                                                                              |

Embase <1974 to 2017 May 17>

| #  | Searches          |
|----|-------------------|
| 1  | acesulfame/       |
| 2  | aspartame/        |
| 3  | cyclamate sodium/ |
| 4  | saccharin/        |
| 5  | sucralose/        |
| 6  | neohesperidin/    |
| 7  | steviol/          |
| 8  | glycoside/        |
| 9  | Stevia/           |
| 10 | neotame/          |
| 11 | sweetening agent/ |

|    |                                                                                                                                                                                                                                                                  |
|----|------------------------------------------------------------------------------------------------------------------------------------------------------------------------------------------------------------------------------------------------------------------|
| 12 | (acesulfam* or aspartam* or cyclam* or sacchar* or sucralose* or neohesperidin* or stevi* or glycosid* or neotame* or sweetening or sweetened or sweetener* or sugar substitute* or sugar free or non-nutritiv* or non-calori* or low-calori* or low-energy).tw. |
| 13 | or/1-12                                                                                                                                                                                                                                                          |
| 14 | appetite/                                                                                                                                                                                                                                                        |
| 15 | food intake/                                                                                                                                                                                                                                                     |
| 16 | body weight/                                                                                                                                                                                                                                                     |
| 17 | weight change/                                                                                                                                                                                                                                                   |
| 18 | obesity/                                                                                                                                                                                                                                                         |
| 19 | weight gain/                                                                                                                                                                                                                                                     |
| 20 | body mass/                                                                                                                                                                                                                                                       |
| 21 | weight reduction/                                                                                                                                                                                                                                                |
| 22 | ((food* or eat*) adj3 (intake* or regulat* or control* or behavio*)).tw.                                                                                                                                                                                         |
| 23 | (appetite* or body weight* or overweight* or weight change* or weight reduc* or weight development* or weight gain* or weight loss* or body mass index or BMI or obesity or gut brain signal* or neuro-behavio* or neurobehavio*).tw.                            |
| 24 | or/14-23                                                                                                                                                                                                                                                         |
| 25 | 13 and 24                                                                                                                                                                                                                                                        |
| 26 | limit 25 to embase                                                                                                                                                                                                                                               |
| 27 | limit 26 to "reviews (best balance of sensitivity and specificity)"                                                                                                                                                                                              |

Cochrane Database of Systematic Reviews: to Issue 5 of 12, May 2017; Health Technology Assessment Database: to Issue 4 of 4, October 2016

| ID  | Search                                                                                                                                                                                                      |
|-----|-------------------------------------------------------------------------------------------------------------------------------------------------------------------------------------------------------------|
| #1  | [mh ^aspartame]:ti,ab,kw Publication Year from 2006 to 2017, in Cochrane Reviews (Reviews and Protocols) (Word variations have been searched)                                                               |
| #2  | [mh ^aspartame] Publication Year from 2006 to 2017, in Other Reviews and Technology Assessments (Word variations have been searched)                                                                        |
| #3  | [mh ^cyclamates]:ti,ab,kw Publication Year from 2006 to 2017, in Cochrane Reviews (Reviews and Protocols) (Word variations have been searched)                                                              |
| #4  | [mh ^cyclamates] Publication Year from 2006 to 2017, in Other Reviews and Technology Assessments (Word variations have been searched)                                                                       |
| #5  | [mh ^saccharin]:ti,ab,kw Publication Year from 2006 to 2017 (Word variations have been searched)                                                                                                            |
| #6  | [mh ^saccharin] Publication Year from 2006 to 2017, in Other Reviews and Technology Assessments (Word variations have been searched)                                                                        |
| #7  | [mh ^stevia]:ti,ab,kw Publication Year from 2006 to 2017, in Cochrane Reviews (Reviews and Protocols) (Word variations have been searched)                                                                  |
| #8  | [mh ^stevia] Publication Year from 2006 to 2017, in Other Reviews and Technology Assessments (Word variations have been searched)                                                                           |
| #9  | [mh ^glycosides]:ti,ab,kw Publication Year from 2006 to 2017, in Cochrane Reviews (Reviews and Protocols) (Word variations have been searched)                                                              |
| #10 | [mh ^glycosides] Publication Year from 2006 to 2017, in Other Reviews and Technology Assessments (Word variations have been searched)                                                                       |
| #11 | [mh ^"sweetening agents"]:ti,ab,kw Publication Year from 2006 to 2017, in Cochrane Reviews (Reviews and Protocols) (Word variations have been searched)                                                     |
| #12 | [mh ^"sweetening agents"] Publication Year from 2006 to 2017, in Other Reviews and Technology Assessments (Word variations have been searched)                                                              |
| #13 | (acesulfam* or aspartam* or cyclam* or sacchar* or sucralose* or neohesperidin* or stevi* or glycosid* or neotame* or sweetening or sweetened or sweetener* or "sugar substitute*" or "sugar free" or "non- |

|     |                                                                                                                                                                                                                                                                                                                                                                                               |
|-----|-----------------------------------------------------------------------------------------------------------------------------------------------------------------------------------------------------------------------------------------------------------------------------------------------------------------------------------------------------------------------------------------------|
|     | nutritiv*" or "non-calori*" or "low-calori*" or "low-energy"):ti,ab,kw Publication Year from 2006 to 2017, in Cochrane Reviews (Reviews and Protocols) (Word variations have been searched)                                                                                                                                                                                                   |
| #14 | (acesulfam* or aspartam* or cyclam* or sacchar* or sucralose* or neohesperidin* or stevi* or glycosid* or neotame* or sweetening or sweetened or sweetener* or "sugar substitute*" or "sugar free" or "non-nutritiv*" or "non-calori*" or "low-calori*" or "low-energy") Publication Year from 2006 to 2017, in Other Reviews and Technology Assessments (Word variations have been searched) |
| #15 | {or #1-#14}                                                                                                                                                                                                                                                                                                                                                                                   |
| #16 | [mh ^"appetite regulation"]:ti,ab,kw Publication Year from 2006 to 2017, in Cochrane Reviews (Reviews and Protocols) (Word variations have been searched)                                                                                                                                                                                                                                     |
| #17 | [mh ^"appetite regulation"] Publication Year from 2006 to 2017, in Other Reviews and Technology Assessments (Word variations have been searched)                                                                                                                                                                                                                                              |
| #18 | [mh ^"body weight"]:ti,ab,kw Publication Year from 2006 to 2017, in Cochrane Reviews (Reviews and Protocols) (Word variations have been searched)                                                                                                                                                                                                                                             |
| #19 | [mh ^"body weight"] Publication Year from 2006 to 2017, in Other Reviews and Technology Assessments (Word variations have been searched)                                                                                                                                                                                                                                                      |
| #20 | [mh ^"body weight changes"]:ti,ab,kw Publication Year from 2006 to 2017, in Cochrane Reviews (Reviews and Protocols) (Word variations have been searched)                                                                                                                                                                                                                                     |
| #21 | [mh ^"body weight changes"] Publication Year from 2006 to 2017, in Other Reviews and Technology Assessments (Word variations have been searched)                                                                                                                                                                                                                                              |
| #22 | [mh ^overweight]:ti,ab,kw Publication Year from 2006 to 2017 (Word variations have been searched)                                                                                                                                                                                                                                                                                             |
| #23 | [mh ^overweight] Publication Year from 2006 to 2017, in Other Reviews and Technology Assessments (Word variations have been searched)                                                                                                                                                                                                                                                         |
| #24 | [mh ^"weight gain"]:ti,ab,kw Publication Year from 2006 to 2017, in Cochrane Reviews (Reviews and Protocols) (Word variations have been searched)                                                                                                                                                                                                                                             |
| #25 | [mh ^"weight gain"] Publication Year from 2006 to 2017, in Other Reviews and Technology Assessments (Word variations have been searched)                                                                                                                                                                                                                                                      |
| #26 | [mh ^"body mass index"]:ti,ab,kw Publication Year from 2006 to 2017, in Cochrane Reviews (Reviews and Protocols) (Word variations have been searched)                                                                                                                                                                                                                                         |
| #27 | [mh ^"body mass index"] Publication Year from 2006 to 2017, in Other Reviews and Technology Assessments (Word variations have been searched)                                                                                                                                                                                                                                                  |
| #28 | [mh ^obesity]:ti,ab,kw Publication Year from 2006 to 2017, in Cochrane Reviews (Reviews and Protocols) (Word variations have been searched)                                                                                                                                                                                                                                                   |
| #29 | [mh ^obesity] Publication Year from 2006 to 2017, in Other Reviews and Technology Assessments (Word variations have been searched)                                                                                                                                                                                                                                                            |
| #30 | [mh ^"weight loss"]:ti,ab,kw Publication Year from 2006 to 2017, in Cochrane Reviews (Reviews and Protocols) (Word variations have been searched)                                                                                                                                                                                                                                             |
| #31 | [mh ^"weight loss"] Publication Year from 2006 to 2017, in Other Reviews and Technology Assessments (Word variations have been searched)                                                                                                                                                                                                                                                      |
| #32 | ((food* or eat*) near/3 (intake* or regulat* or control* or behavio*)):ti,ab,kw Publication Year from 2006 to 2017, in Cochrane Reviews (Reviews and Protocols) (Word variations have been searched)                                                                                                                                                                                          |
| #33 | ((food* or eat*) near/3 (intake* or regulat* or control* or behavio*)) Publication Year from 2006 to 2017, in Other Reviews and Technology Assessments (Word variations have been searched)                                                                                                                                                                                                   |
| #34 | (appetite* or "body weight*" or overweight* or "weight change*" or "weight reduc*" or "weight development*" or "weight gain*" or "weight loss*" or "body mass index" or BMI or obesity or "gut brain signal*" or "neuro-behavo*" or neurobehavio*):ti,ab,kw Publication Year from 2006 to 2017, in Cochrane Reviews (Reviews and Protocols) (Word variations have been searched)              |
| #35 | (appetite* or "body weight*" or overweight* or "weight change*" or "weight reduc*" or "weight development*" or "weight gain*" or "weight loss*" or "body mass index" or BMI or obesity or "gut brain signal*" or "neuro-behavo*" or neurobehavio*) Publication Year from 2006 to 2017, in Other Reviews and Technology Assessments (Word variations have been searched)                       |
| #36 | {or #16-#35}                                                                                                                                                                                                                                                                                                                                                                                  |
| #37 | #15 and #36                                                                                                                                                                                                                                                                                                                                                                                   |

Epistemonikos:

(title:(acesulfam\* OR aspartam\* OR cyclam\* OR sacchar\* OR sucralose\* OR neohesperidin\* OR stevi\* OR glycosid\* OR neotame\* OR sweetening OR sweetened OR sweetener OR "sugar substitute\*" OR "sugar free" OR "non-nutritiv\*" OR "non-calori\*" OR "low-calori\*" OR "low-energy") AND (appetite\* OR "food intake\*" OR eating OR "body weight\*" OR overweight\* OR "weight change\*" OR "weight reduc\*" OR "weight development\*" OR "weight gain\*" OR "weight loss\*" OR "body mass index" OR BMI OR obesity OR "gut brain signal\*" OR "neuro-behavo\*" OR neurobehavio\*)) OR abstract:(acesulfam\* OR aspartam\* OR cyclam\* OR sacchar\* OR sucralose\* OR neohesperidin\* OR stevi\* OR glycosid\* OR neotame\* OR sweetening OR sweetened OR sweetener OR "sugar substitute\*" OR "sugar free" OR "non-nutritiv\*" OR "non-calori\*" OR "low-calori\*" OR "low-energy") AND (appetite\* OR "food intake\*" OR eating OR "body weight\*" OR overweight\* OR "weight change\*" OR "weight reduc\*" OR "weight development\*" OR "weight gain\*" OR "weight loss\*" OR "body mass index" OR BMI OR obesity OR "gut brain signal\*" OR "neuro-behavo\*" OR neurobehavio\*))

Web of Science (core collection):

| Set | Results |                                                                                                                                                                                                                                                                                                                                                                                    |
|-----|---------|------------------------------------------------------------------------------------------------------------------------------------------------------------------------------------------------------------------------------------------------------------------------------------------------------------------------------------------------------------------------------------|
| # 5 | 138     | #4 AND #1<br><i>Indexes=SCI-EXPANDED, SSCI, A&amp;HCI, ESCI Timespan=2006-2017</i>                                                                                                                                                                                                                                                                                                 |
| # 4 | 5,969   | #3 OR #2<br><i>Indexes=SCI-EXPANDED, SSCI, A&amp;HCI, ESCI Timespan=2006-2017</i>                                                                                                                                                                                                                                                                                                  |
| # 3 | 5,532   | (TS=(appetite* or "body weight*" or overweight* or "weight change*" or "weight reduc*" or "weight development*" or "weight gain*" or "weight loss*" or "body mass index" or BMI or obesity or "gut brain signal*" or "neuro-behavo*" or neurobehavio*)) AND DOCUMENT TYPES: (Review)<br><i>Indexes=SCI-EXPANDED, SSCI, A&amp;HCI, ESCI Timespan=2006-2017</i>                      |
| # 2 | 877     | (TS=((food* or eat*) NEAR/3 (intake* or regulat* or control* or behavio*))) AND DOCUMENT TYPES: (Review)<br><i>Indexes=SCI-EXPANDED, SSCI, A&amp;HCI, ESCI Timespan=2006-2017</i>                                                                                                                                                                                                  |
| # 1 | 1,915   | (TS=(acesulfam* or aspartam* or cyclam* or sacchar* or sucralose* or neohesperidin* or stevi* or glycosid* or neotame* or sweetening or sweetened or sweetener or "sugar substitute*" or "sugar free" or "non-nutritiv*" or "non-calori*" or "low-calori*" or "low-energy")) AND DOCUMENT TYPES: (Review)<br><i>Indexes=SCI-EXPANDED, SSCI, A&amp;HCI, ESCI Timespan=2006-2017</i> |
